# Supplementary material
Source: PubMed Central journal article supplement (PMC3245212)

## **Participating institutions**

The following CALGB institutions, principal investigators, and cytogeneticists participated in this study:

Wake Forest University School of Medicine, Winston-Salem, NC: David D. Hurd, P. Nagesh Rao, Wendy L. Flejter and Mark J. Pettenati (grant no. CA03927); The Ohio State University Medical Center, Columbus, OH: Clara D. Bloomfield, Karl S. Theil, Diane Minka and Nyla A. Heerema (grant no. CA77658); North Shore–Long Island Jewish Health System, Manhasset, NY: Daniel R. Budman and Prasad R. K. Koduru (grant no. CA35279); University of Iowa Hospitals, Iowa City, IA: Daniel A. Vaena and Shivanand R. Patil (grant no. CA47642); Roswell Park Cancer Institute, Buffalo, NY: Ellis G. Levine and AnneMarie W. Block (grant no. CA02599); Duke University Medical Center, Durham, NC: Jeffrey Crawford, Sandra H. Bigner, Mazin B. Qumsiyeh, John Eyre and Barbara K. Goodman (grant no. CA47577); Washington University School of Medicine, St. Louis, MO: Nancy L. Bartlett, Michael S. Watson, Eric C. Crawford, and Jaime Garcia-Heras (grant no. CA77440); Dana Farber Cancer Institute, Boston, MA: Harold J. Burstein, Ramana Tantravahi, Leonard L. Atkins, Paola Dal Cin and Cynthia C. Morton (grant no. CA32291); University of North Carolina, Chapel Hill, NC: Thomas C. Shea and Kathleen W. Rao (grant no. CA47559); University of Chicago Medical Center, Chicago, IL: Hedy L. Kindler, Diane Roulston, Katrin M. Carlson, Yanming Zhang and Michelle M. Le Beau (grant no. CA41287); University of Massachusetts Medical Center, Worcester, MA: William V. Walsh, Vikram Jaswaney, Michael J. Mitchell and Patricia Miron (grant no. CA37135); Dartmouth Medical School, Lebanon, NH: Konstantin Dragnev, Doris H. Wurster-Hill and Thuluvancheri K. Mohandas (grant no. CA04326); Vermont Cancer Center, Burlington, VT: Steven M. Grunberg, Elizabeth F. Allen and Mary Tang (grant no. CA77406); Weill Medical College of Cornell University, New York, NY: John Leonard, Ram S. Verma, Prasad R.K. Koduru and Susan Mathew (grant no. CA07968); Ft. Wayne Medical Oncology/Hematology, Ft.

Wayne, IN: Sreenivasa Nattam and Patricia I. Bader; Minneapolis VA Medical Center, Minneapolis, MN: Vicki A. Morrison and Sugandhi A. Tharapel (grant no. CA47555); Eastern Maine Medical Center, Bangor, ME: Harvey M. Segal and Laurent J. Beauregard (grant no. CA35406); Mount Sinai School of Medicine, New York, NY: Lewis R. Silverman and Vesna Najfeld (grant no. CA04457); University of Puerto Rico School of Medicine, San Juan, PR: Eileen I. Pacheco, Leonard L. Atkins, Paola Dal Cin and Cynthia C. Morton; Rhode Island Hospital, Providence, RI: William Sikov, Teresita Padre-Mendoza, Hon Fong L. Mark, Shelly L. Kerman and Aurelia Meloni-Ehrig (grant no. CA08025); SUNY Upstate Medical University, Syracuse, NY: Stephen L. Graziano, Larry Gordon and Constance K. Stein (grant no. CA21060); Christiana Care Health Services, Inc., Newark, DE: Stephen S. Grubbs, Digamber S. Borgaonkar and Jeanne M. Meck (grant no. CA45418); Long Island Jewish Medical Center CCOP, Lake Success, NY: Kanti R. Rai and Prasad R. K. Koduru (grant no. CA11028); Massachusetts General Hospital, Boston, MA: Jeffrey W. Clark, Leonard L. Atkins, Paola Dal Cin and Cynthia C. Morton (grant no. CA 12449); University of California at San Diego: Barbara A. Parker, Renée Bernstein and Marie L. Dell'Aquila (grant no. CA11789); University of Maryland Cancer Center, Baltimore, MD: Martin J. Edelman, Joseph R. Testa, Maimon M. Cohen, Judith Stamberg, and Yi Ning (grant no. CA31983); Western Pennsylvania Hospital, Pittsburgh, PA: John Lister and Gerard R. Diggans; University of Minnesota, Minneapolis, MN: Bruce A. Peterson, Diane C. Arthur and Betsy A. Hirsch (grant no. CA16450); University of Missouri/Ellis Fischel Cancer Center, Columbia, MO: Michael C. Perry and Tim H. Huang (grant no. CA12046); University of Nebraska Medical Center, Omaha, NE: Anne Kessinger and Warren G. Sanger (grant no. CA77298); University of Illinois at Chicago: David J. Peace, Maureen M. McCorquodale and Kathleen E. Richkind (grant no. CA74811); Walter Reed Army Medical Center, Washington, DC: David C. Van Echo, Rawatmal B. Surana and Digamber S. Borgaonkar (grant no. CA26806); Georgetown University Medical Center, Washington, DC: Minnetta C. Liu and Jeanne M. Meck (grant no. CA77597); McGill Department of Oncology,

Montreal, Quebec: J. L. Hutchison and Jacqueline Emond (grant no. CA31809); Medical University of South Carolina, Charleston, SC: Mark R. Green, G. Shashidhar Pai and Daynna J. Wolff (grant no. CA03927); University of Cincinnati Medical Center, Cincinnati, OH: Orlando J. Martelo and Ashok K. Srivastava (grant no. CA47515); Columbia-Presbyterian Medical Center, New York, NY: Rose R. Ellison and Dorothy Warburton (grant no. CA12011); Virginia Commonwealth University MB CCOP, Richmond, VA: John D. Roberts and Colleen Jackson-Cook (grant no. CA52784); SUNY Maimonides Medical Center, Brooklyn, NY: Sameer Rafla and Ram S. Verma (grant no. CA25119); Southern Nevada Cancer Research Foundation CCOP, Las Vegas, NV: John Ellerton and Marie L. Dell'Aquila (grant no. CA35421); University of California at San Francisco: Charles J. Ryan and Kathleen E. Richkind (grant no. CA60138).

### ***Treatment protocols***

All patients included in the outcome analyses were treated on Cancer and Leukemia Group B (CALGB) first-line protocols for older ( $\geq 60$  years) patients with acute myeloid leukemia (AML), and received cytarabine/daunorubicin-based induction therapy followed by cytarabine-based consolidation therapy. None of the protocols included autologous or allogeneic stem cell transplantation in first complete remission (CR). Patients on CALGB 8525 ( $n=24$ ) were treated with induction chemotherapy consisting of cytarabine in combination with daunorubicin and were randomly assigned to consolidation with different doses of cytarabine followed by maintenance treatment.<sup>1</sup> For older patients, there were no significant differences in disease-free (DFS) or overall survival (OS) among the different consolidation regimens. Patients on CALGB 8923 ( $n=22$ ) received induction chemotherapy consisting of cytarabine and daunorubicin and were randomly assigned to receive postremission therapy with cytarabine alone or in combination with mitoxantrone, resulting in no significant difference in DFS or OS between both arms.<sup>2</sup> Patients on CALGB 9420 ( $n=5$ ) and 9720 ( $n=110$ ) received induction chemotherapy consisting of cytarabine in combination with daunorubicin and etoposide, with (CALGB 9420) or with/without (CALGB 9720) the multidrug resistance protein modulator PSC-833.<sup>3,4</sup> The PSC-833 arm of CALGB 9720 was closed after random assignment of 120 patients because of excessive early deaths, and enrollment continued on the chemotherapy-only control arm. Patients on CALGB 9420 received postremission therapy with cytarabine ( $2 \text{ g/m}^2/\text{d}$ ) alone, and patients on CALGB 9720 received a single cytarabine/daunorubicin consolidation course and were then randomly assigned to low-dose recombinant interleukin-2 maintenance therapy or none.<sup>5</sup> Interleukin-2 maintenance was not associated with differences in DFS or OS. Patients on

CALGB 10201 (n=73) received induction chemotherapy consisting of cytarabine and daunorubicin, with or without the *BCL2* antisense oblimersen sodium. The consolidation regimen included two cycles of cytarabine (2 g/m<sup>2</sup>/d) with or without oblimersen. Preliminary results showed no impact of the antisense therapy on outcome.<sup>6</sup> Patients who enrolled on the treatment protocols also provided written informed consent to participate in the companion protocols CALGB 8461 (prospective cytogenetic companion), CALGB 9665 (leukemia tissue bank) and CALGB 20202 (molecular studies in acute myeloid leukemia), which involved collection of pretreatment bone marrow (BM) aspirates, blood samples, and buccal swabs.

### ***Mutational analyses***

To our knowledge, *ASXL1* mutations in AML have exclusively been described in the last coding exon of the gene.<sup>7,8</sup> Previous publications on *ASXL1* mutations have uniformly referred to this exon as exon 12. However, according to the National Center for Biotechnology Information (NCBI) reference sequence database (identifier NM\_015338.5), it is numbered exon 14. To avoid potentially confusing inconsistency with the published literature, we use the designation exon 12 throughout the manuscript. Annotation of sequence variants follows the recommendations of the Human Genome Variation Society ([www.hgvs.org](http://www.hgvs.org)) and is based on NCBI reference sequence NM\_015338.5.

Mononuclear cells from BM and blood samples from patients with cytogenetically normal (CN-) AML were enriched through Ficoll-Hypaque gradient centrifugation, and cryopreserved for later use. Genomic DNA and total RNA were extracted as described previously.<sup>9</sup> The coding portion of *ASXL1* exon 12 was amplified from genomic DNA by polymerase chain reaction (PCR) in three overlapping amplicons, using 30 ng of input DNA for each reaction. PCR conditions and

primers are described in supplemental Table 6. PCR products were treated with exonuclease I and shrimp alkaline phosphatase (ExoSAP-IT, Affymetrix/USB, Cleveland, OH) to degrade residual PCR primers and deoxynucleotides, and 3-4  $\mu$ l of the cleaned-up PCR product were then used for direct sequencing using amplicon-specific primers (Applied Biosystems 3730 DNA Analyzer and BigDye Terminator Cycle Sequencing Kit version 3.1, Applied Biosystems, Foster City, CA). Screening for mutations in *CEBPA* was performed as reported previously.<sup>9</sup> For patients with double *CEBPA* mutations, the entire coding region was amplified from genomic DNA in a single PCR, and subsequently cloned and sequenced to allow allelic discrimination.

### ***Gene- and microRNA-expression profiling***

Gene expression profiles were obtained using Affymetrix HG-U133 plus 2.0 oligonucleotide microarrays (Affymetrix, Santa Clara, CA). Details regarding sample preparation and array hybridization have been published previously.<sup>10,11</sup> Briefly, summary measures of gene expression were computed for each probe-set using the robust multichip average method, which incorporates quantile normalization of arrays. Expression values were logged (base 2) before analysis. A filtering step was performed to remove probe-sets that did not display significant variation in expression across arrays. In this procedure, a  $\chi^2$  test was used to test whether the observed variance in expression of a probe-set was significantly larger than the median observed variance in expression for all probe-sets, using  $\alpha=.01$  as the significance level. A total of 24,649 probe-sets passed the filtering criterion. Normalized expression values were compared between *ASXL1*-mutated (-mut) and *ASXL1*-wild-type (-wt) patients, and a univariable significance level of .001 was used to identify differentially expressed probe-sets. To avoid confounding due to the strong association of mutated *ASXL1* with *NPM1*-wt and absence of *FLT3*-internal tandem duplications (*FLT3*-ITD), this comparison was limited to *NPM1*-wt/*FLT3*-ITD-negative patients. A global test of significance based on a permutation procedure

was performed to determine whether or not the number of differentially expressed probe sets was more than expected by chance; if not, no signature is reported for the comparison. The Gene Set Analysis (GSA) algorithm was used to test whether genes belonging to certain pre-defined gene sets were deregulated in association with *ASXL1* mutation status. Gene sets were obtained from the Broad Institute's Molecular Signatures Database (MSigDB version 3.0, available online at <http://www.broadinstitute.org/gsea/msigdb/>).<sup>12</sup> We used the curated 'canonical pathways' collection that contains 880 curated gene sets representing canonical biological processes and pathways. Only one probe set per gene was included in the analysis by choosing the probe set with highest average expression across samples. 11,224 probe sets representing as many genes were analyzed. Gene sets that contained fewer than 5 or more than 100 analyzed genes were omitted from analysis, resulting in 820 studied gene sets. A univariable significance level of .005 was used for the comparisons.

For microRNA (miR) microarrays [Ohio State University Comprehensive Cancer Center (OSU\_CCC) custom miR array, version 4.0], signal intensities were calculated for each spot, with an adjustment made for local background. Spots that were flagged due to low signal-to-noise ratio on more than 75% of arrays were excluded from analysis. Signal intensities were log-transformed and quantile normalization was performed on arrays using spots for all human and mouse microRNA probes represented on the array. Log-signal intensities from replicate spots (ie, spots representing the same probe) were averaged. For each miR probe, an adjustment was made for batch effects (ie, differences in expression related to the batch in which arrays were hybridized). Further analysis was limited to 460 unique human probes that passed the filtering criterion. A comparison of miR expression was made between *ASXL1*-mut and *ASXL1*-wt patients, using a univariable significance level of .005 to identify differentially expressed miR probes. To avoid confounding due to the strong association of mutated *ASXL1*

with *NPM1*-wt and absence of *FLT3*-internal tandem duplications (*FLT3*-ITD), this comparison was limited to *NPM1*-wt/*FLT3*-ITD-negative patients. A global test of significance based on a permutation procedure was performed to determine whether or not the number of differentially expressed probes was more than expected by chance; if not, no signature is reported for the comparison. All microarray analyses were performed using BRB-ArrayTools Version 3.8.1, developed by Richard Simon, DSc, and Amy Peng Lam.

### ***Definition of clinical endpoints***

Clinical endpoints were defined, in accordance with generally accepted criteria, as follows: CR required a BM aspirate with cellularity greater than 20% and maturation of all cell lines, less than 5% blasts and no Auer rods; in the peripheral blood, an absolute neutrophil count of  $\geq 1,500/\mu\text{L}$ , platelet count of  $>100,000/\mu\text{L}$ , and no leukemic blasts; and no evidence of extramedullary leukemia, all of which had to persist for at least 1 month.<sup>13</sup> Patients who died within 30 days of starting therapy were not studied so that resistance as opposed to early death primarily accounted for failure to achieve CR. Relapse was defined by the presence of  $\geq 5\%$  BM blasts, or circulating leukemic blasts, or the development of extramedullary leukemia. DFS was measured from the date of CR until the date of relapse or death; patients alive and in complete remission were censored at last follow-up. OS was measured from the date of study entry until the date of death, and patients alive at last follow-up were censored. Event-free survival (EFS) was measured from the date of study entry until the date of failure to achieve CR, relapse or death, and patients alive and in complete remission at last follow-up were censored.



### **Multivariable analyses**

Multivariable logistic regression models were generated for attainment of CR, and multivariable proportional hazards models were constructed for DFS and OS, using a limited backwards elimination procedure. Variables considered for model inclusion and evaluated in univariable models were: *ASXL1* mutation status, European LeukemiaNet (ELN) genetic category (based on the presence/absence of *FLT3*-ITD, and *NPM1* and *CEBPA* mutations), *ASXL1* mutation-by-ELN group interaction, mutation status of the *TET2*, *WT1*, *IDH1*, and *IDH2* genes, *FLT3*-tyrosine kinase domain mutation status, *MLL* partial tandem duplication status, age (as a continuous variable), sex, race (white vs nonwhite), white blood count (WBC), hemoglobin, and platelet count. Variables significant at  $\alpha=.20$  from the univariable analyses were considered for multivariable analyses. For the time-to-event endpoints, the proportional hazards assumption was checked for each variable individually.

***Clinical and molecular characteristics and outcomes of ASXL1-mut primary CN-AML patients younger than 60 years***

Nonsense or frame shift mutations in *ASXL1* exon 12 were found in only six younger primary CN-AML patients. Due to this small number, a detailed analysis of *ASXL1* mutations in younger patients (aged 18–59 years) was not possible. However, it appeared that the clinical and molecular characteristics of *ASXL1*-mut younger patients were largely consistent with our findings in older patients. The six younger *ASXL1*-mut patients were aged 41, 45, 48, 56, 58, and 58 years, and five of the six were male. *ASXL1*-mut younger patients had lower BM blast percentages (median, 53%) than *ASXL1*-wt patients (n=170; median, 68%;  $P=.06$ ). None of the six *ASXL1*-mut patients was *NPM1*-mut, compared with 68% of *ASXL1*-wt patients ( $P=.002$ ). One of the six *ASXL1*-mut patients had a *FLT3*-ITD, and two carried *CEBPA* mutations. Of note, three of the six *ASXL1*-mut patients (50%) had mutated *IDH2*, compared to 10% of *ASXL1*-wt patients ( $P=.02$ ). This finding should be interpreted cautiously in the light of the small numbers, since no similar association was seen in older patients. No other pretreatment patient characteristics showed significant associations with *ASXL1* mutations in younger patients. With regard to treatment outcomes, four of the six younger *ASXL1*-mut patients achieved CR, but three of them relapsed after 14, 21, and 30 months, respectively. The two patients who did not achieve CR and two of the three relapsing patients subsequently died. One patient who achieved CR after induction chemotherapy and subsequently received an autologous stem cell transplant per protocol is alive in CR 8 years after diagnosis. One patient who relapsed and received an allogeneic stem cell transplant is alive 5 years post-transplant.

## REFERENCES

1. Mayer RJ, Davis RB, Schiffer CA, et al. Intensive Postremission Chemotherapy in Adults with Acute Myeloid Leukemia. *N Engl J Med.* 1994;331(14):896-903.
2. Stone R, Berg D, George S, et al. Postremission therapy in older patients with de novo acute myeloid leukemia: a randomized trial comparing mitoxantrone and intermediate-dose cytarabine with standard-dose cytarabine. *Blood.* 2001;98(3):548-553.
3. Baer MR, George SL, Dodge RK, et al. Phase 3 study of the multidrug resistance modulator PSC-833 in previously untreated patients 60 years of age and older with acute myeloid leukemia: Cancer and Leukemia Group B Study 9720. *Blood.* 2002;100(4):1224-1232.
4. Lee EJ, George SL, Caligiuri M, et al. Parallel phase I studies of daunorubicin given with cytarabine and etoposide with or without the multidrug resistance modulator PSC-833 in previously untreated patients 60 years of age or older with acute myeloid leukemia: results of cancer and leukemia group B study 9420. *J Clin Oncol.* 1999;17(9):2831-2839.
5. Baer MR, George SL, Caligiuri MA, et al. Low-Dose Interleukin-2 Immunotherapy Does Not Improve Outcome of Patients Age 60 Years and Older With Acute Myeloid Leukemia in First Complete Remission: Cancer and Leukemia Group B Study 9720. *J Clin Oncol.* 2008;26(30):4934-4939.
6. Marcucci G, Moser B, Blum W, et al. A phase III randomized trial of intensive induction and consolidation chemotherapy +/- oblimersen, a pro-apoptotic Bcl-2 antisense oligonucleotide in untreated acute myeloid leukemia patients >60 years old. *J Clin Oncol.* 2007;25(suppl, abstr 7012).

7. Gelsi-Boyer V, Trouplin V, Adélaïde J, et al. Mutations of polycomb-associated gene *ASXL1* in myelodysplastic syndromes and chronic myelomonocytic leukaemia. *Br J Haematol.* 2009;145(6):788-800.
8. Carbuccia N, Murati A, Trouplin V, et al. Mutations of *ASXL1* gene in myeloproliferative neoplasms. *Leukemia.* 2009;23(11):2183-2186.
9. Marcucci G, Maharry K, Radmacher MD, et al. Prognostic Significance of, and Gene and MicroRNA Expression Signatures Associated With, *CEBPA* Mutations in Cytogenetically Normal Acute Myeloid Leukemia With High-Risk Molecular Features: A Cancer and Leukemia Group B Study. *J Clin Oncol.* 2008;26(31):5078-5087.
10. Becker H, Marcucci G, Maharry K, et al. Favorable Prognostic Impact of *NPM1* Mutations in Older Patients With Cytogenetically Normal De Novo Acute Myeloid Leukemia and Associated Gene- and MicroRNA-Expression Signatures: A Cancer and Leukemia Group B Study. *J Clin Oncol.* 2009;28(4):596-604.
11. Metzeler KH, Maharry K, Radmacher MD, et al. *TET2* Mutations Improve the New European LeukemiaNet Risk Classification of Acute Myeloid Leukemia: A Cancer and Leukemia Group B Study. *J Clin Oncol.* 2011;29(10):1373-1381.
12. Subramanian A, Tamayo P, Mootha VK, et al. Gene set enrichment analysis: a knowledge-based approach for interpreting genome-wide expression profiles. *Proc Natl Acad Sci U S A.* 2005;102(43):15545-15550.
13. Cheson BD, Cassileth PA, Head DR, et al: Report of the National Cancer Institute-sponsored workshop on definitions of diagnosis and response in acute myeloid leukemia. *J Clin Oncol.* 1990; 8(5):813-819.

14. Abdel-Wahab O, Pardanani A, Patel J, et al. Concomitant analysis of *EZH2* and *ASXL1* mutations in myelofibrosis, chronic myelomonocytic leukemia and blast-phase myeloproliferative neoplasms [letter]. *Leukemia*. 2011;25(7):1200-1202.
15. Bejar R, Stevenson K, Abdel-Wahab O, et al. Clinical effect of point mutations in myelodysplastic syndromes. *N Engl J Med*. 2011;364(26):2496-2506.
16. Clarke LA. PCR amplification introduces errors into mononucleotide and dinucleotide repeat sequences. *Mol Pathol*. 2001;54(5):351-353.
17. Fazekas A, Steeves R, Newmaster S. Improving sequencing quality from PCR products containing long mononucleotide repeats. *Biotechniques*. 2010;48(4):277-285.

**Table S1. ASXL1 exon 12 mutations in 423 patients with primary CN-AML**

| <b>Patients aged 60 years or older (n=234)</b> |                                           |                           |                      |
|------------------------------------------------|-------------------------------------------|---------------------------|----------------------|
| <b>cDNA sequence change</b>                    | <b>Deduced change in protein sequence</b> | <b>Number of patients</b> | <b>Mutation type</b> |
| c.1749G>A                                      | p.(Trp583*)                               | 1                         | nonsense             |
| c.1772dupA                                     | p.(Tyr591*)                               | 1                         | frame shift          |
| c.1779dupA                                     | p.(Cys594Metfs*25)                        | 1                         | frame shift          |
| c.1786dupC                                     | p.(Arg596Profs*23)                        | 1                         | frame shift          |
| c.1793_1794delTCinsA                           | p.(Ile598Asnfs*105)                       | 1 <sup>†</sup>            | frame shift          |
| c.1867C>T                                      | p.(Gln623*)                               | 1                         | nonsense             |
| c.1900_1922del23                               | p.(Glu635Argfs*15)                        | 5                         | frame shift          |
| c.1903G>T                                      | p.(Glu635*)                               | 1                         | nonsense             |
| c.1911dupC                                     | p.(Thr638Hisfs*20)                        | 1                         | frame shift          |
| c.1934dupG                                     | p.(Gly646Trpfs*12)                        | 20                        | frame shift          |
| c.2077C>T                                      | p.(Arg693*)                               | 2 <sup>†</sup>            | nonsense             |
| c.2100T>A                                      | p.(Tyr700*)                               | 1                         | nonsense             |
| c.2254_2255delGCinsT                           | p.(Ala752Phefs*20)                        | 1                         | frame shift          |
| c.2332C>T                                      | p.(Gln778*)                               | 1                         | nonsense             |
| c.2348_2349insT                                | p.(Asp784Glyfs*3)                         | 1                         | frame shift          |

  

| <b>Patients younger than 60 years (n=189)</b> |                                           |                           |                      |
|-----------------------------------------------|-------------------------------------------|---------------------------|----------------------|
| <b>cDNA Sequence Change</b>                   | <b>Deduced change in protein sequence</b> | <b>Number of patients</b> | <b>Mutation type</b> |
| c.1900_1922del23                              | p.(Glu635Argfs*15)                        | 1                         | frame shift          |
| c.1934dupG                                    | p.(Gly646Trpfs*12)                        | 3                         | frame shift          |
| c.1937delG                                    | p.(Gly646Alafs*57)                        | 1                         | frame shift          |
| c.2094_2095dupGC                              | p.(Pro699Argfs*5)                         | 1                         | frame shift          |

NOTE: Mutation nomenclature is based on ASXL1 mRNA reference sequence NM\_015338.5 and follows the guidelines of the Human Genome Variation Society, version 2.0 ([www.hgvs.org](http://www.hgvs.org)).

<sup>†</sup> One older patient had two ASXL1 mutations (c.2077C>T and c.1793\_1794delTCinsA)

**Table S2. List of *ASXL1* exon 12 missense changes not annotated as known SNPs in the dbSNP database (version 132)**

| <b>Patients aged 60 years or older (n=234)</b> |                                           |                           |                                                                                            |
|------------------------------------------------|-------------------------------------------|---------------------------|--------------------------------------------------------------------------------------------|
| <b>cDNA sequence change</b>                    | <b>Deduced change in protein sequence</b> | <b>Number of patients</b> | <b>Comment</b>                                                                             |
| c.2222A>T                                      | p.(Leu741Val)                             | 1                         |                                                                                            |
| c.2862C>A                                      | p.(Asp954Glu)                             | 1                         |                                                                                            |
| c.2957A>G                                      | p.(Asn986Ser)                             | 2                         | Described as germline SNP by Bejar et al <sup>15</sup>                                     |
| c.3306G>T                                      | p.(Glu1102Asp)                            | 5                         | Described as germline SNP by Abdel-Wahab et al <sup>14</sup>                               |
| c.3416C>A                                      | p.(Thr1139Lys)                            | 1                         |                                                                                            |
| c.3503G>C                                      | p.(Ser1168Thr)                            | 1                         |                                                                                            |
| c.3745A>G                                      | p.(Met1249Val)                            | 1                         | Described as germline SNP by Abdel-Wahab et al <sup>14</sup> and Bejar et al <sup>15</sup> |
| c.3793G>T                                      | p.(Asp1265Tyr)                            | 1 <sup>†</sup>            |                                                                                            |
| c.3935C>T                                      | p.(Ala1312Val)                            | 2                         | Described as germline SNP by Bejar et al <sup>15</sup>                                     |
| c.4183C>G                                      | p.(Leu1395Val)                            | 1                         |                                                                                            |
| c.4189G>A                                      | p.(Gly1397Ser)                            | 1 <sup>†</sup>            | Described as germline SNP by Bejar et al <sup>15</sup>                                     |

| <b>Patients younger than 60 years (n=189)</b> |                                           |                           |                                                                      |
|-----------------------------------------------|-------------------------------------------|---------------------------|----------------------------------------------------------------------|
| <b>cDNA sequence change</b>                   | <b>Deduced change in protein sequence</b> | <b>Number of patients</b> | <b>Comment</b>                                                       |
| c.1850T>C                                     | p.(Ile617Thr)                             | 1                         |                                                                      |
| c.2053G>A                                     | p.(Gly685Arg)                             | 1                         |                                                                      |
| c.2395G>T                                     | p.(Asp799Tyr)                             | 1                         |                                                                      |
| c.2597T>C                                     | p.(Leu866Ser)                             | 1                         |                                                                      |
| c.2957A>G                                     | p.(Asn986Ser)                             | 1                         | Described as germline SNP by Bejar et al <sup>15</sup>               |
| c.3306G>T                                     | p.(Glu1102Asp)                            | 4                         | Described as germline SNP by Abdel-Wahab et al <sup>14</sup>         |
| c.3745A>G                                     | p.(Met1249Val)                            | 2                         | Described as germline SNP by Abdel-Wahab et al <sup>14</sup>         |
| c.3973C>T                                     | p.(Leu1325Phe)                            | 1                         | Subsequently described as germline SNP in dbSNP database (rs6057581) |
| c.4189G>A                                     | p.(Gly1397Ser)                            | 1                         | Described as germline SNP by Bejar et al <sup>15</sup>               |

NOTE: Mutation nomenclature is based on *ASXL1* mRNA reference sequence NM\_015338.5 and follows the guidelines of the Human Genome Variation Society, version 2.0 (www.hgvs.org).

<sup>†</sup> One patient had two missense changes (c.3793G>T and c.4189G>A)

**Table S3. Relationship of ASXL1 mutation status with outcomes in primary CN-AML patients aged 60 years or older with mutated or wild-type CEBPA**

|                                  |                                    | ASXL1-mut | ASXL1-wt   | P     | OR/HR (95% CI)     |
|----------------------------------|------------------------------------|-----------|------------|-------|--------------------|
| <b>CEBPA-mut patients (n=27)</b> | No. of patients                    | 10        | 17         |       |                    |
|                                  | Complete remission, no. (%)        | 5 (50)    | 13 (76)    | .21   | 0.31 (0.06, 1.64)  |
|                                  | Disease-free survival              |           |            | ND*   | ND                 |
|                                  | Median, years                      | 0.4       | 1.0        |       |                    |
|                                  | % Disease-free at 3 years (95% CI) | 0         | 31 (9-55)  |       |                    |
|                                  | Overall survival                   |           |            | <.001 | 5.43 (1.92, 15.36) |
|                                  | Median (years)                     | 0.8       | 1.6        |       |                    |
|                                  | % Alive at 3 years (95% CI)        | 0         | 35 (14-57) |       |                    |
|                                  | Event-free survival                |           |            | .02   | 2.66 (1.11, 6.41)  |
|                                  | Median, years                      | 0.2       | 0.7        |       |                    |
| % Event-free at 3 years (95% CI) | 0                                  | 24 (7-45) |            |       |                    |
| <b>CEBPA-wt patients (n=193)</b> | No. of patients                    | 28        | 165        |       |                    |
|                                  | Complete remission, no. (%)        | 15 (54)   | 116 (70)   | .08   | 0.49 (0.22, 1.10)  |
|                                  | Disease-free survival              |           |            | .17   | 1.46 (0.85, 2.52)  |
|                                  | Median, years                      | 0.7       | 1.0        |       |                    |
|                                  | % Disease-free at 3 years (95% CI) | 13 (2-35) | 18 (12-26) |       |                    |
|                                  | Overall survival                   |           |            | .11   | 1.39 (0.93, 2.09)  |
|                                  | Median, years                      | 1.1       | 1.2        |       |                    |
|                                  | % Alive at 3 years (95% CI)        | 7 (1-20)  | 22 (16-28) |       |                    |
|                                  | Event-free survival                |           |            | .03   | 1.54 (1.03, 2.31)  |
|                                  | Median, years                      | 0.5       | 0.7        |       |                    |
| % Event-free at 3 years (95% CI) | 7 (1-20)                           | 13 (8-18) |            |       |                    |

NOTE: Due to small patient numbers, CEBPA single- and double-mutated patients could not be analyzed separately. ND indicates not determined.

\* A P value for DFS was not calculated in this group, since only five CEBPA-mut/ASXL1-mut patients achieved complete remission.



**Table S4. List of probe sets differentially expressed between 26 *ASXL1*-mut and 39 *ASXL1*-wt CN-AML patients aged 60 years or older with wild-type *NPM1* and no *FLT3*-ITD**

| Probe set                                                       | Gene symbol         | Gene name                                                                                        | Fold change:<br><i>ASXL1</i> -mut v<br><i>ASXL1</i> -wt | <i>P</i> |
|-----------------------------------------------------------------|---------------------|--------------------------------------------------------------------------------------------------|---------------------------------------------------------|----------|
| <b>Genes up-regulated in patients with mutated <i>ASXL1</i></b> |                     |                                                                                                  |                                                         |          |
| 225745_at                                                       | <i>LRP6</i>         | low density lipoprotein receptor-related protein 6                                               | 4.17                                                    | 1.00E-07 |
| 224435_at                                                       | <i>C10orf58</i>     | chromosome 10 open reading frame 58                                                              | 3.35                                                    | 2.30E-06 |
| 201667_at                                                       | <i>GJA1</i>         | gap junction protein, alpha 1, 43kDa                                                             | 3.24                                                    | 1.08E-04 |
| 202437_s_at                                                     | <i>CYP1B1</i>       | cytochrome P450, family 1, subfamily B, polypeptide 1                                            | 3.08                                                    | 1.72E-04 |
| 202436_s_at                                                     | <i>CYP1B1</i>       | cytochrome P450, family 1, subfamily B, polypeptide 1                                            | 2.70                                                    | 1.78E-04 |
| 204793_at                                                       | <i>GPRASP1</i>      | G protein-coupled receptor associated sorting protein 1                                          | 2.66                                                    | 4.70E-06 |
| 201215_at                                                       | <i>PLS3</i>         | plastin 3                                                                                        | 2.63                                                    | 9.55E-05 |
| 205174_s_at                                                     | <i>QPCT</i>         | glutaminyl-peptide cyclotransferase                                                              | 2.61                                                    | 2.09E-05 |
| 228155_at                                                       | <i>C10orf58</i>     | chromosome 10 open reading frame 58                                                              | 2.58                                                    | 1.47E-05 |
| 219271_at                                                       | <i>GALNT14</i>      | UDP-N-acetyl-alpha-D-galactosamine:polypeptide N-acetylgalactosaminyltransferase 14 (GalNAc-T14) | 2.57                                                    | 2.52E-05 |
| 202435_s_at                                                     | <i>CYP1B1</i>       | cytochrome P450, family 1, subfamily B, polypeptide 1                                            | 2.55                                                    | 8.48E-05 |
| 217901_at                                                       | <i>DSG2</i>         | desmoglein 2                                                                                     | 2.50                                                    | 1.27E-05 |
| 202888_s_at                                                     | <i>ANPEP</i>        | alanyl (membrane) aminopeptidase                                                                 | 2.26                                                    | 2.80E-04 |
| 228557_at                                                       | <i>L3MBTL4</i>      | l(3)mbt-like 4 (Drosophila)                                                                      | 2.22                                                    | 9.50E-06 |
| 1557961_s_at                                                    | <i>LOC100127983</i> | hypothetical protein LOC100127983                                                                | 2.21                                                    | 3.52E-04 |
| 220617_s_at                                                     | <i>ZNF532</i>       | zinc finger protein 532                                                                          | 2.11                                                    | 1.15E-04 |
| 203543_s_at                                                     | <i>KLF9</i>         | Kruppel-like factor 9                                                                            | 2.09                                                    | 9.24E-04 |
| 228376_at                                                       | <i>GGTA1</i>        | glycoprotein, alpha-galactosyltransferase 1                                                      | 2.01                                                    | 9.17E-04 |

| Probe set    | Gene symbol                 | Gene name                                             | Fold change:<br>ASXL1-mut v<br>ASXL1-wt | P        |
|--------------|-----------------------------|-------------------------------------------------------|-----------------------------------------|----------|
| 225021_at    | <i>ZNF532</i>               | zinc finger protein 532                               | 2.00                                    | 4.08E-05 |
| 227077_at    | <i>ZNF286A/<br/>ZNF286B</i> | zinc finger protein 286A/<br>zinc finger protein 286B | 1.98                                    | 4.10E-06 |
| 239265_at    | <i>TMEM20</i>               | transmembrane protein 20                              | 1.98                                    | 6.00E-07 |
| 218236_s_at  | <i>PRKD3</i>                | protein kinase D3                                     | 1.98                                    | 9.22E-05 |
| 222446_s_at  | <i>BACE2</i>                | beta-site APP-cleaving enzyme 2                       | 1.96                                    | 1.06E-04 |
| 200771_at    | <i>LAMC1</i>                | laminin, gamma 1 (formerly LAMB2)                     | 1.95                                    | 2.05E-04 |
| 201348_at    | <i>GPX3</i>                 | glutathione peroxidase 3 (plasma)                     | 1.95                                    | 7.46E-04 |
| 1553105_s_at | <i>DSG2</i>                 | desmoglein 2                                          | 1.94                                    | 3.03E-04 |
| 226575_at    | <i>ZNF462</i>               | zinc finger protein 462                               | 1.90                                    | 7.00E-07 |
| 203146_s_at  | <i>GABBR1</i>               | gamma-aminobutyric acid (GABA) B receptor, 1          | 1.88                                    | 9.71E-05 |
| 223170_at    | <i>TMEM98</i>               | transmembrane protein 98                              | 1.86                                    | 4.85E-04 |
| 229464_at    | <i>MYEF2</i>                | myelin expression factor 2                            | 1.83                                    | 4.89E-04 |
| 224817_at    | <i>SH3PXD2A</i>             | SH3 and PX domains 2A                                 | 1.82                                    | 1.51E-04 |
| 229116_at    | <i>CNKSR2</i>               | connector enhancer of kinase suppressor of Ras 2      | 1.80                                    | 7.37E-04 |
| 239742_at    | <i>TULP4</i>                | tubby like protein 4                                  | 1.74                                    | 1.47E-04 |
| 224327_s_at  | <i>DGAT2</i>                | diacylglycerol O-acyltransferase homolog 2 (mouse)    | 1.73                                    | 2.16E-05 |
| 226003_at    | <i>KIF21A</i>               | kinesin family member 21A                             | 1.72                                    | 1.90E-04 |
| 226064_s_at  | <i>DGAT2</i>                | diacylglycerol O-acyltransferase homolog 2 (mouse)    | 1.72                                    | 4.14E-04 |
| 1556682_s_at |                             | Homo sapiens full length insert cDNA clone ZD73H04    | 1.72                                    | 4.36E-04 |
| 234199_at    |                             | Homo sapiens cDNA FLJ21633 fis                        | 1.72                                    | 9.17E-04 |
| 204454_at    | <i>LDOC1</i>                | leucine zipper, down-regulated in cancer 1            | 1.71                                    | 3.95E-04 |
| 210852_s_at  | <i>AASS</i>                 | aminoadipate-semialdehyde synthase                    | 1.71                                    | 6.61E-04 |
| 240903_at    |                             | Transcribed locus Hs.666593                           | 1.71                                    | 1.68E-04 |

| Probe set   | Gene symbol     | Gene name                                                            | Fold change:<br>ASXL1-mut v<br>ASXL1-wt | P        |
|-------------|-----------------|----------------------------------------------------------------------|-----------------------------------------|----------|
| 236565_s_at | <i>LARP6</i>    | La ribonucleoprotein domain family, member 6                         | 1.70                                    | 9.41E-04 |
| 243591_at   |                 | Transcribed locus Hs.656732                                          | 1.69                                    | 1.68E-04 |
| 218184_at   | <i>TULP4</i>    | tubby like protein 4                                                 | 1.67                                    | 1.27E-04 |
| 226925_at   | <i>ACPL2</i>    | acid phosphatase-like 2                                              | 1.65                                    | 2.98E-04 |
| 205606_at   | <i>LRP6</i>     | low density lipoprotein receptor-related protein 6                   | 1.64                                    | 1.00E-07 |
| 1556650_at  |                 | Homo sapiens cDNA FLJ13011 fis                                       | 1.64                                    | 2.90E-04 |
| 1557684_at  | <i>ZNF286A</i>  | zinc finger protein 286A                                             | 1.62                                    | 1.30E-06 |
| 229974_at   | <i>EVC2</i>     | Ellis van Creveld syndrome 2                                         | 1.62                                    | 4.23E-04 |
| 217867_x_at | <i>BACE2</i>    | beta-site APP-cleaving enzyme 2                                      | 1.60                                    | 5.95E-04 |
| 229194_at   | <i>PCGF5</i>    | polycomb group ring finger 5                                         | 1.57                                    | 1.64E-04 |
| 232664_at   | <i>FLJ12334</i> | hypothetical gene supported by AK022396; AK097927                    | 1.55                                    | 5.00E-07 |
| 211564_s_at | <i>PDLIM4</i>   | PDZ and LIM domain 4                                                 | 1.54                                    | 5.83E-05 |
| 201147_s_at | <i>TIMP3</i>    | TIMP metalloproteinase inhibitor 3                                   | 1.53                                    | 7.52E-04 |
| 213709_at   | <i>BHLHB9</i>   | basic helix-loop-helix domain containing, class B, 9                 | 1.52                                    | 5.43E-05 |
| 205802_at   | <i>TRPC1</i>    | transient receptor potential cation channel, subfamily C, member 1   | 1.51                                    | 7.68E-04 |
| 226029_at   | <i>VANGL2</i>   | vang-like 2 (van gogh, Drosophila)                                   | 1.50                                    | 6.34E-04 |
| 1563453_at  |                 | Transcribed locus Hs.683977                                          | 1.49                                    | 5.41E-04 |
| 229623_at   | <i>TMEM150C</i> | transmembrane protein 150C                                           | 1.48                                    | 5.88E-04 |
| 223311_s_at | <i>MTA3</i>     | metastasis associated 1 family, member 3                             | 1.47                                    | 2.03E-04 |
| 226770_at   | <i>MAGI3</i>    | membrane associated guanylate kinase, WW and PDZ domain containing 3 | 1.47                                    | 1.36E-05 |
| 209234_at   | <i>KIF1B</i>    | kinesin family member 1B                                             | 1.47                                    | 9.92E-04 |
| 203906_at   | <i>IQSEC1</i>   | IQ motif and Sec7 domain 1                                           | 1.47                                    | 5.62E-04 |
| 1558522_at  | <i>MPP6</i>     | membrane protein, palmitoylated 6 (MAGUK p55 subfamily member 6)     | 1.42                                    | 6.37E-04 |

| Probe set                                                  | Gene symbol   | Gene name                                              | Fold change:<br>ASXL1-mut v<br>ASXL1-wt | P        |
|------------------------------------------------------------|---------------|--------------------------------------------------------|-----------------------------------------|----------|
| 238803_at                                                  | <i>HECTD2</i> | HECT domain containing 2                               | 1.42                                    | 6.14E-04 |
| 214829_at                                                  | <i>AASS</i>   | aminoadipate-semialdehyde synthase                     | 1.42                                    | 6.04E-04 |
| 240568_at                                                  |               | Homo sapiens cDNA clone IMAGE:2722444                  | 1.42                                    | 7.96E-04 |
| 238983_at                                                  | <i>NSUN7</i>  | NOP2/Sun domain family, member 7                       | 1.38                                    | 1.60E-04 |
| 223621_at                                                  | <i>PNMA3</i>  | paraneoplastic antigen MA3                             | 1.37                                    | 4.55E-04 |
| 232549_at                                                  | <i>RBM11</i>  | RNA binding motif protein 11                           | 1.36                                    | 6.82E-04 |
| 225303_at                                                  | <i>KIRREL</i> | kin of IRRE like (Drosophila)                          | 1.36                                    | 5.44E-04 |
| 214175_x_at                                                | <i>PDLIM4</i> | PDZ and LIM domain 4                                   | 1.34                                    | 2.60E-04 |
| 219740_at                                                  | <i>VASH2</i>  | vasohibin 2                                            | 1.33                                    | 1.84E-04 |
| 1556656_at                                                 |               | Transcribed locus Hs.655421                            | 1.32                                    | 2.11E-04 |
| 220214_at                                                  | <i>ZNF215</i> | zinc finger protein 215                                | 1.27                                    | 8.19E-04 |
| <b>Genes down-regulated in patients with mutated ASXL1</b> |               |                                                        |                                         |          |
| 230867_at                                                  | <i>COL6A6</i> | collagen, type VI, alpha 6                             | 0.89                                    | 2.46E-04 |
| 1562940_at                                                 | <i>DOCK7</i>  | dedicator of cytokinesis 7                             | 0.80                                    | 7.73E-04 |
| 1556103_at                                                 |               | Homo sapiens cDNA FLJ44114 fis                         | 0.80                                    | 7.99E-04 |
| 218480_at                                                  | <i>AGBL5</i>  | ATP/GTP binding protein-like 5                         | 0.79                                    | 5.96E-04 |
| 242517_at                                                  | <i>KISS1R</i> | KISS1 receptor                                         | 0.78                                    | 1.15E-04 |
| 213643_s_at                                                | <i>INPP5B</i> | inositol polyphosphate-5-phosphatase, 75kDa            | 0.76                                    | 9.64E-04 |
| 238107_at                                                  |               | Transcribed locus Hs.147507                            | 0.76                                    | 3.56E-04 |
| 210441_at                                                  | <i>CDC14A</i> | CDC14 cell division cycle 14 homolog A (S. cerevisiae) | 0.75                                    | 6.10E-04 |
| 206703_at                                                  | <i>CHRNB1</i> | cholinergic receptor, nicotinic, beta 1 (muscle)       | 0.73                                    | 9.23E-04 |
| 209975_at                                                  | <i>CYP2E1</i> | cytochrome P450, family 2, subfamily E, polypeptide 1  | 0.71                                    | 7.37E-04 |
| 244037_at                                                  |               | Transcribed locus Hs.212051                            | 0.70                                    | 2.34E-04 |

| Probe set    | Gene symbol   | Gene name                                                                                       | Fold change:<br>ASXL1-mut v<br>ASXL1-wt | P        |
|--------------|---------------|-------------------------------------------------------------------------------------------------|-----------------------------------------|----------|
| 210594_x_at  | <i>MPZL1</i>  | myelin protein zero-like 1                                                                      | 0.68                                    | 4.73E-04 |
| 205408_at    | <i>MLLT10</i> | myeloid/lymphoid or mixed-lineage leukemia (trithorax homolog, Drosophila); translocated to, 10 | 0.67                                    | 6.88E-04 |
| 216860_s_at  | <i>GDF11</i>  | growth differentiation factor 11                                                                | 0.67                                    | 4.80E-04 |
| 1559048_at   | <i>BAHCC1</i> | BAH domain and coiled-coil containing 1                                                         | 0.63                                    | 8.00E-05 |
| 1559049_a_at | <i>BAHCC1</i> | BAH domain and coiled-coil containing 1                                                         | 0.46                                    | 3.50E-06 |
| 236553_at    |               | Transcribed locus Hs.649477                                                                     | 0.46                                    | 9.00E-07 |

**Table S5. Gene sets representing functional pathways significantly deregulated between *ASXL1*-mut and *ASXL1*-wt CN-AML patients aged 60 years or older with wild-type *NPM1* and no *FLT3*-ITD, as identified by the gene set analysis algorithm.**

| Gene set representing biological pathway                  | Number of genes included in analysis | <i>P</i> | Direction of deregulation          |
|-----------------------------------------------------------|--------------------------------------|----------|------------------------------------|
| KEGG: O-GLYCAN BIOSYNTHESIS                               | 17                                   | <.002    | upregulated in <i>ASXL1</i> -mut   |
| REACTOME:<br>SLC MEDIATED TRANSMEMBRANE TRANSPORT         | 84                                   | <.002    | upregulated in <i>ASXL1</i> -mut   |
| REACTOME:<br>CYTOCHROME P450 ARRANGED BY SUBSTRATE TYPE   | 14                                   | .002     | upregulated in <i>ASXL1</i> -mut   |
| REACTOME:<br>APOPTOTIC CLEAVAGE OF CELL ADHESION PROTEINS | 6                                    | .002     | upregulated in <i>ASXL1</i> -mut   |
| REACTOME:<br>INORGANIC CATION ANION SLC TRANSPORTERS      | 46                                   | .002     | upregulated in <i>ASXL1</i> -mut   |
| BIOCARTA: NO1 PATHWAY                                     | 15                                   | .002     | downregulated in <i>ASXL1</i> -mut |
| BIOCARTA: DREAM PATHWAY                                   | 9                                    | .002     | downregulated in <i>ASXL1</i> -mut |
| KEGG: GLYCEROLIPID METABOLISM                             | 35                                   | .004     | upregulated in <i>ASXL1</i> -mut   |
| REACTOME:<br>TRANSMISSION ACROSS CHEMICAL SYNAPSES        | 65                                   | .004     | upregulated in <i>ASXL1</i> -mut   |
| REACTOME: PYRIMIDINE METABOLISM                           | 19                                   | .004     | downregulated in <i>ASXL1</i> -mut |

**NOTE:** Gene sets were obtained from the 'curated pathways' collection of the molecular signatures database (MSigDB), version 3.0. *P* values are from Efron-Tibshirani's GSA test.

**Table S6. List of PCR primers and conditions**

| Amplicon                | Length  | Primer sequences                   | DNA polymerase                                 | Cycling conditions                                                       |
|-------------------------|---------|------------------------------------|------------------------------------------------|--------------------------------------------------------------------------|
| ASXL1 exon<br>12 part 1 | 1225 bp | 14_1F: 5' -CTGAATGGTGTGTTATGGCG-3' | Phusion Hot Start High-Fidelity DNA Polymerase | 98°C, 30s; followed by 37 cycles of 98°C / 10s, 63°C / 30s, 72°C / 30s.  |
|                         |         | 14_1R: 5' -GGGGCTCAACAGATGGTATG-3' |                                                |                                                                          |
| ASXL1 exon<br>12 part 2 | 1214 bp | 14_2F: 5' -ACACCTGAATCCTCACCGAC-3' | AmpliTaq Gold DNA Polymerase                   | 94°C, 300s; followed by 37 cycles of 94°C / 20s, 60°C / 40s, 72°C / 90s. |
|                         |         | 14_2R: 5' -TCCTGTGACATAGCACGGAC-3' |                                                |                                                                          |
| ASXL1 exon<br>12 part 3 | 1223 bp | 14_3F: 5' -AAAGAATTGCAAGGCAGTCC-3' | AmpliTaq Gold DNA Polymerase                   | 94°C, 300s; followed by 37 cycles of 94°C / 20s, 60°C / 40s, 72°C / 90s. |
|                         |         | 14_3R: 5' -TATACCCAGGAAACCCCTCC-3' |                                                |                                                                          |

NOTE: Phusion Hot Start High-Fidelity DNA Polymerase (Finnzymes/Thermo Fisher Scientific, Lafayette, CO) and AmpliTaq Gold Polymerases (Applied Biosystems, Foster City, CA) were used in their manufacturer-supplied buffers, and reactions were set up in a final volume of 25µl containing 1.6mM Mg<sup>2+</sup> and 0.5µM of each primer.

**Figure S1. Survival of CN-AML patients aged 60 years or older with missense changes in *ASXL1* exon 12, compared to *ASXL1*-wt and *ASXL1*-mut patients. (A) EFS in the entire cohort of older CN-AML patients; (B) EFS within the ELN Favorable genetic group.**

**Figure S2. Survival of *ASXL1*-mut and *ASXL1*-wt CN-AML patients aged 60 years or older, according to *CEBPA* mutation status. (A) OS within *CEBPA*-mut and (B) within *CEBPA*-wt patients. (C) EFS within *CEBPA*-mut and (D) within *CEBPA*-wt patients.**

**Figure S3. Survival of older ELN favorable CN-AML patients with mutated *ASXL1*, compared to *ASXL1*-wt/*TET2*-wt patients and to *ASXL1*-wt/*TET2*-mut patients. (A) OS; (B) EFS.**

**Figure S4. Evidence supporting that *ASXL1* c.1934dupG represents a mutation rather than technical artifact.** The figure shows representative chromatograms obtained by sequencing PCR products from a patient with an *ASXL1* c.1934dupG mutation (Patient #288, left side) and a patient without this mutation (Patient #144, right side). c.1934dupG denotes insertion of a guanine (G) nucleotide at coding sequence position 1934. This insertion occurs within a mononucleotide stretch that normally comprises eight G nucleotides. During PCR amplification of DNA, mononucleotide repeats longer than 8-10 nucleotides can lead to the formation of aberrant products due to a phenomenon called 'polymerase slippage'. Slippage errors most commonly result in products where the mononucleotide repeat is aberrantly shortened (contracted).<sup>16</sup> These aberrant products then may appear as artifacts in subsequent



sequencing reactions, mimicking a deletion or insertion in the DNA template. Some PCR polymerases, including Phusion Hot Start High-Fidelity DNA polymerase (Finnzymes/Thermo Fisher Scientific, Lafayette, CO), have been shown to be relatively resistant to this kind of error, and can reliably amplify homopolymer stretches of 13 or more nucleotides without slippage.<sup>17</sup>

In DNA from the BM of patient #288 (left column), the c.1934dupG mutation was detected in a heterozygous-appearing pattern, both when using a *Taq*-derived DNA polymerase (AmpliTaq Gold, Applied Biosystems, Foster City, CA; top) and when using the slippage-resistant Phusion DNA polymerase (middle). When DNA from a buccal swab from the same patient was studied using Phusion polymerase (bottom), a wild-type sequence without evidence of an insertion was obtained. In total, buccal swab DNA was available from six patients who had c.1934dupG detected in the BM, and in all cases we obtained a clean wild-type sequence from the germline DNA.

In patient #144 (right side), when PCR was performed on BM DNA using AmpliTaq Gold polymerase (top), the sequencing chromatogram showed some minor peaks most likely representing 'slippage' products after the mononucleotide stretch (highlighted by the red arrows). When the slippage-resistant Phusion polymerase was used to amplify BM DNA from the same patient, a clean wild-type sequence was obtained (below).

For all 23 patients with the c.1934dupG mutation, the finding was confirmed in at least two independent PCR and sequencing reactions. PCR reactions were also repeated for 30 patients where c.1934dupG was not detected initially, and absence of c.1934dupG was confirmed in the repeat analysis in all cases.

Figure S1

A

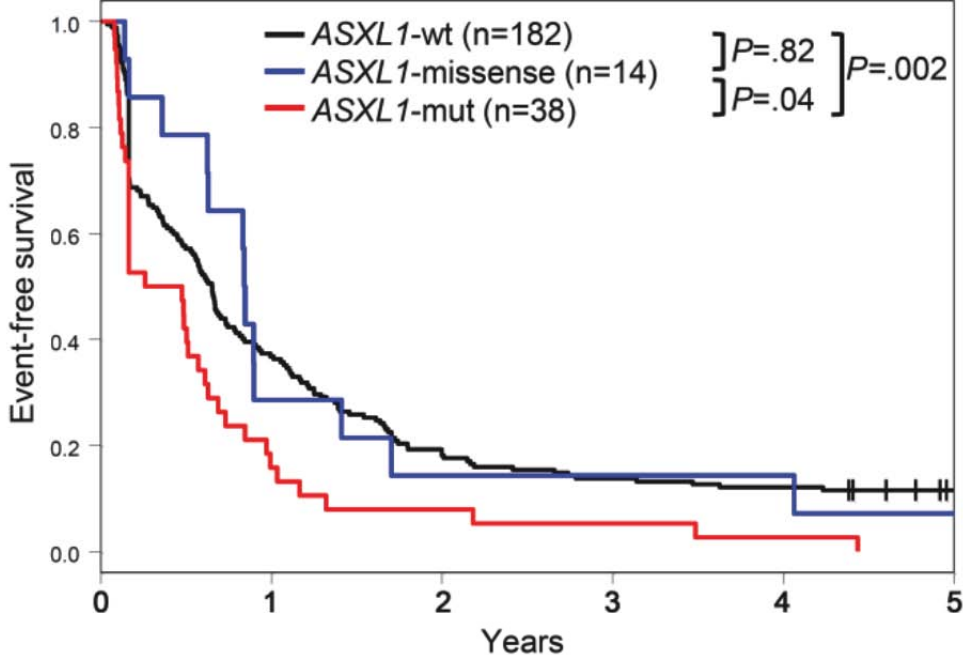

B

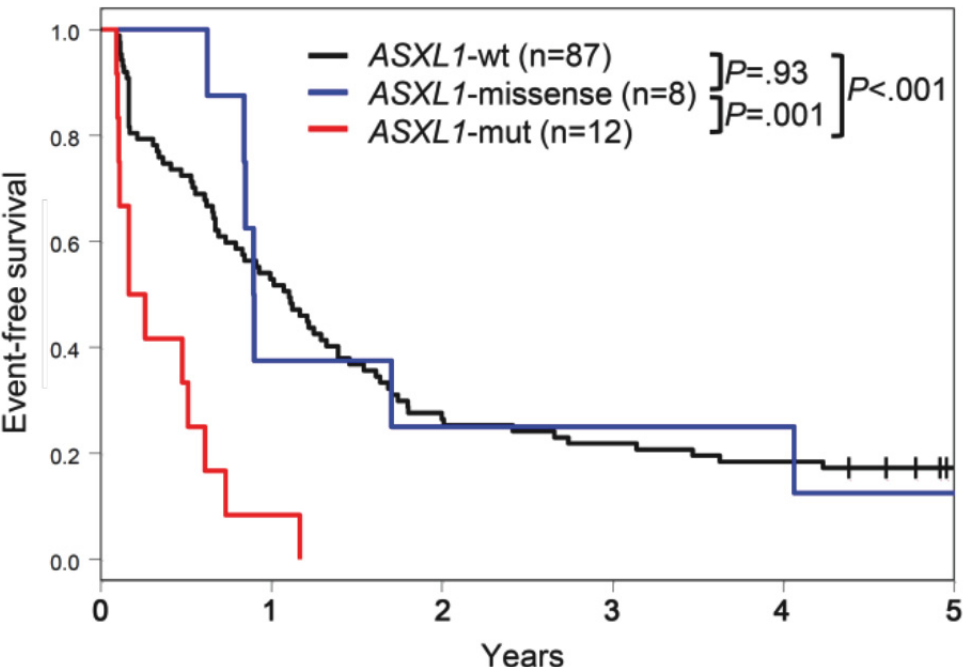

Figure S2

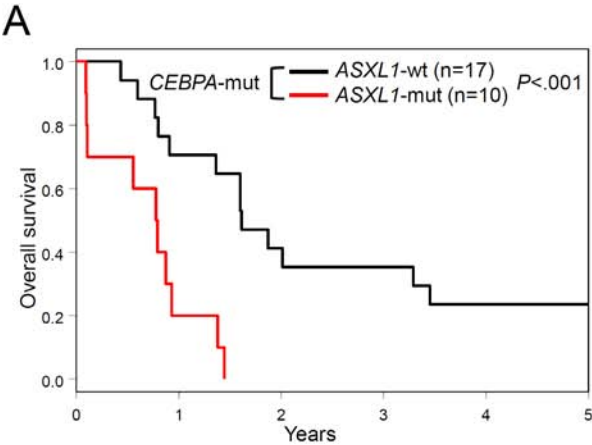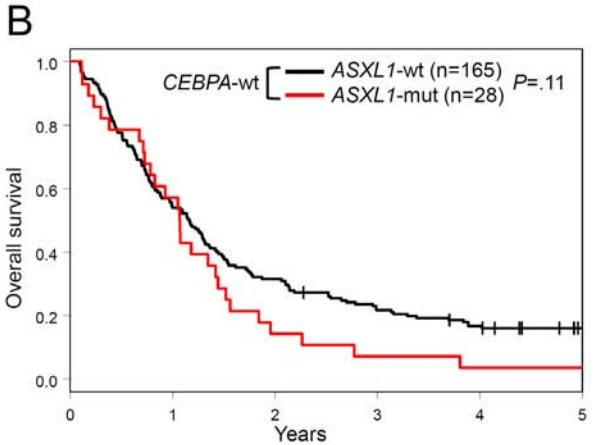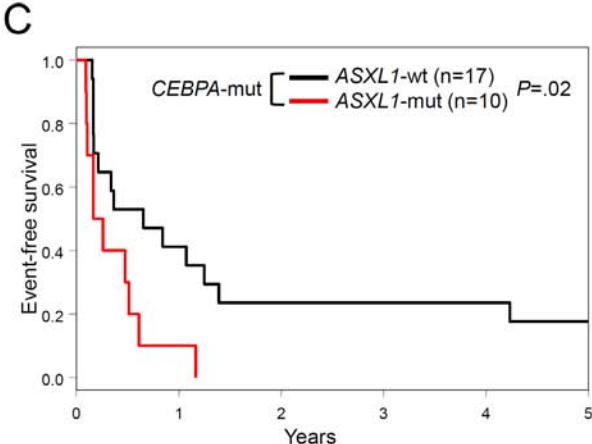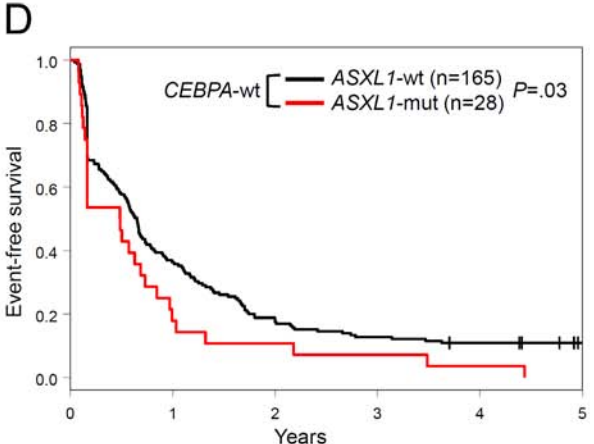

Figure S3

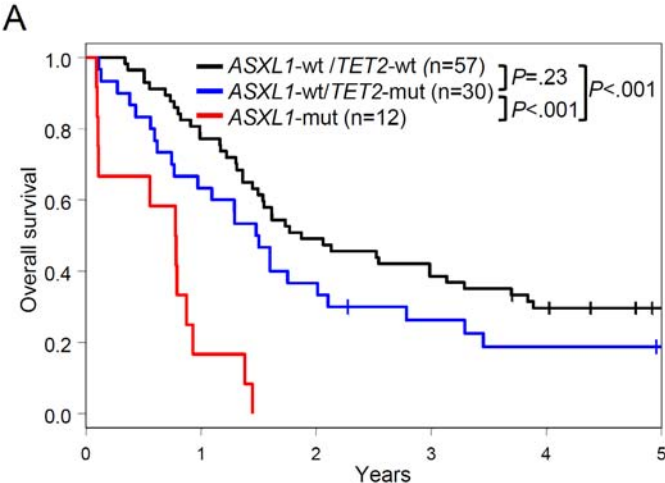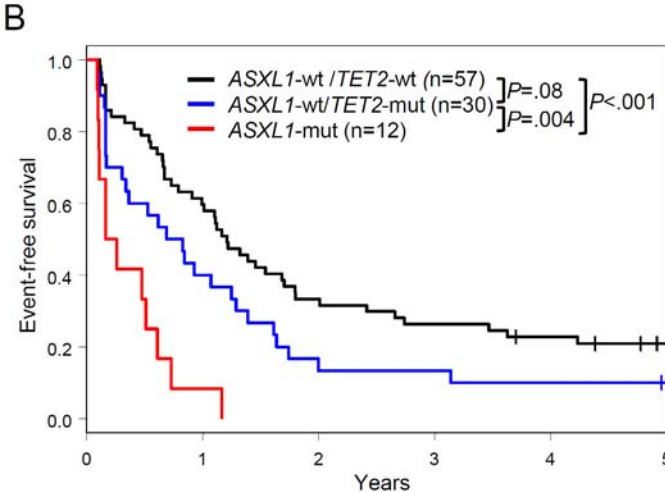

**Figure S4**

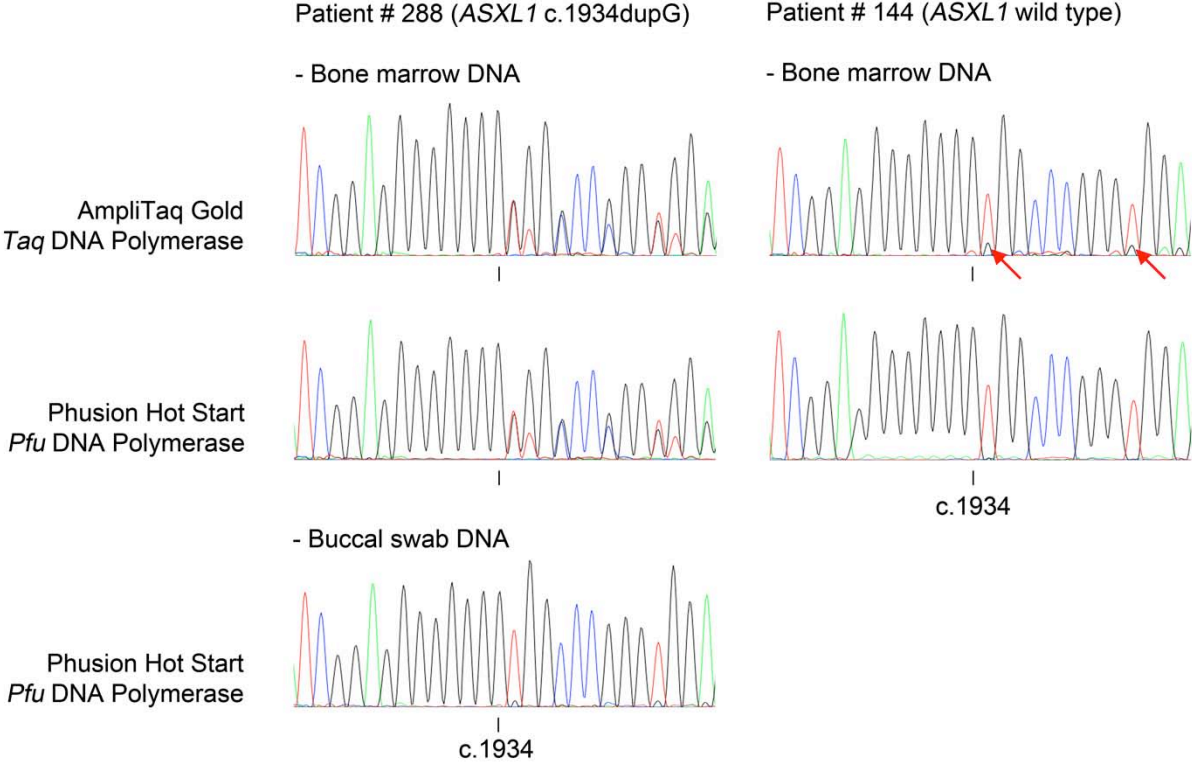

Supplement: supp_blood-2011-08-368225_Document1.pdf [file supp_blood-2011-08-368225_Document1.pdf]
